# Supplementary material for: Activation of Inflammatory and Pro-Thrombotic Pathways in Acute Stress Cardiomyopathy
Source: PubMed Central journal article supplement (PMC5541033; doi:10.3389/fcvm.2017.00049), 2017-08-03

Supplementary Figure 1. Bar plots for the normal vs. SCM and SCM post comparison. The proteins shown in this figure are the 45 proteins that were significantly different ( $\log_2 \text{FC} > 1$ ;  $q < 0.05$ ) in the normal vs. SCM comparison. Normal (n=6), SCM (n=15), SCM Post (n=11).

**a2-Macroglobulin**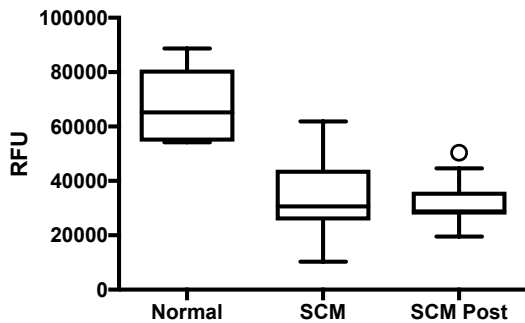**Albumin**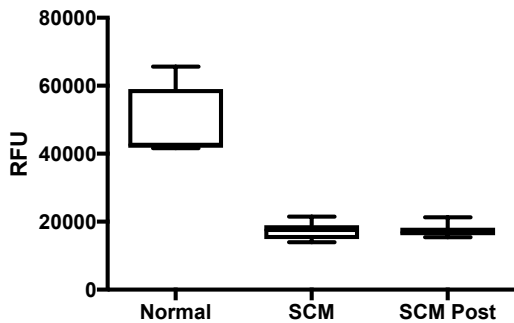**Apo B**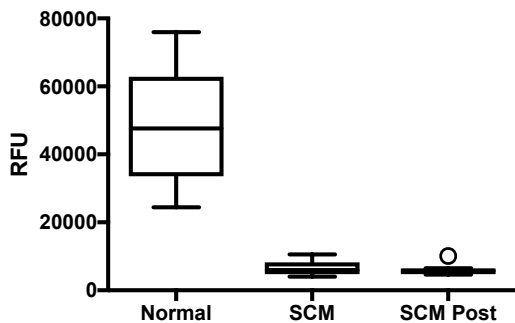**Apo E**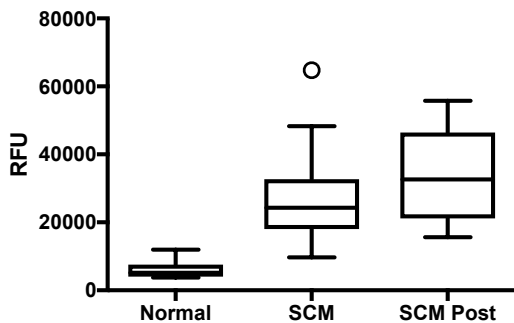**Apo E3**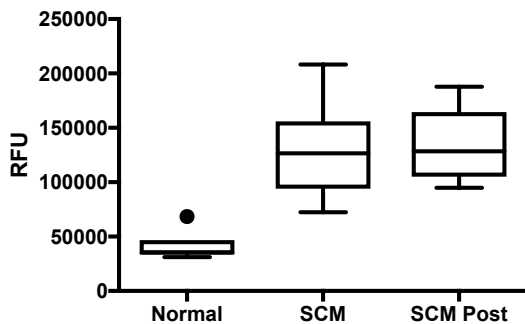**Apo E4**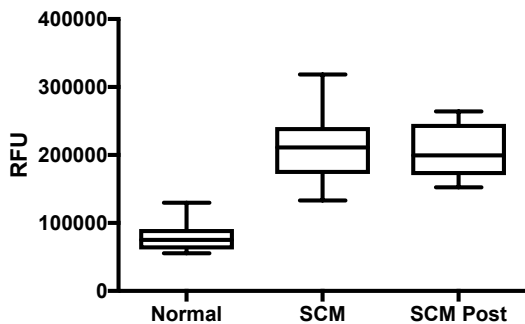**Artemin**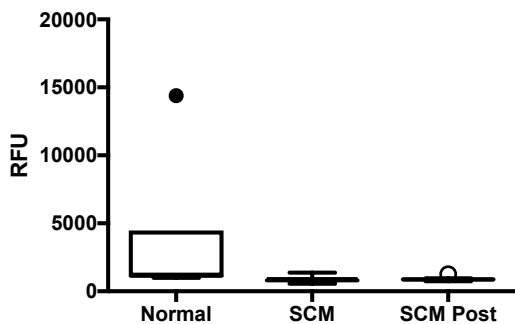**Azurocidin**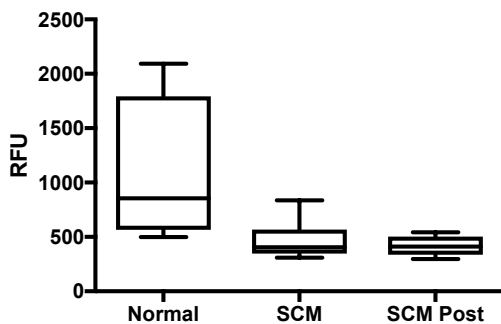

**C3**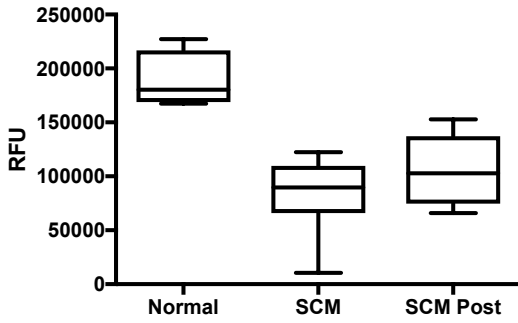**C3a**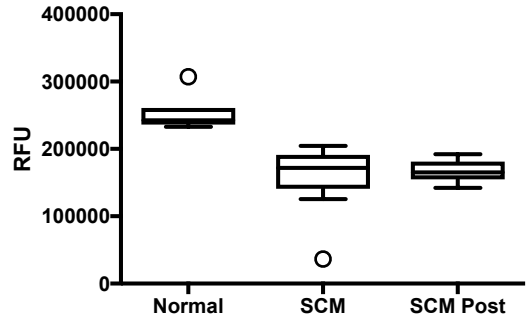**C3b**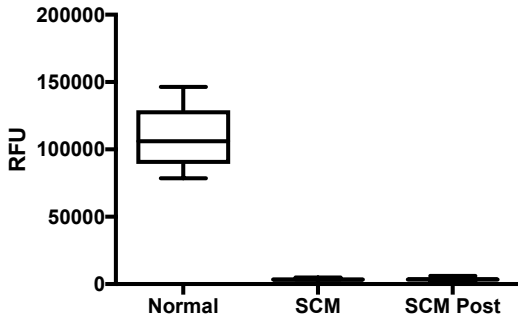**C4b**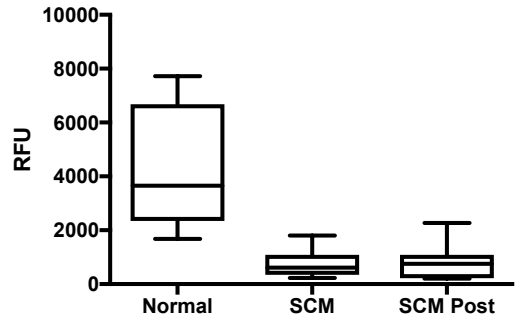**Carbonic Anhydrase XIII**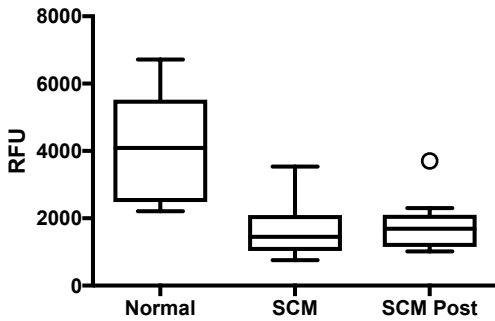**Coagulation Factor IX**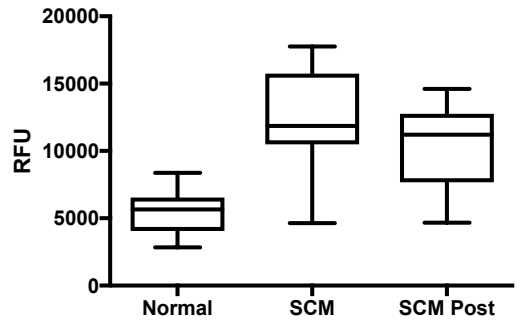**Coagulation Factor IXab**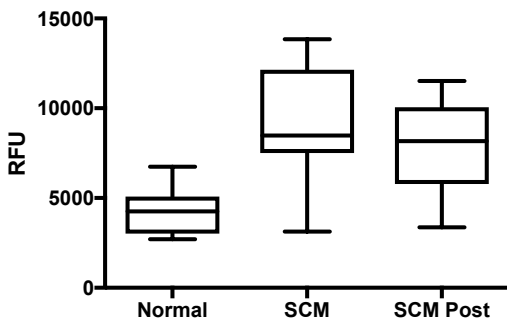**Coagulation Factor V**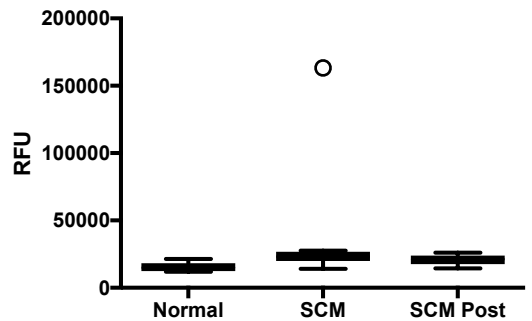

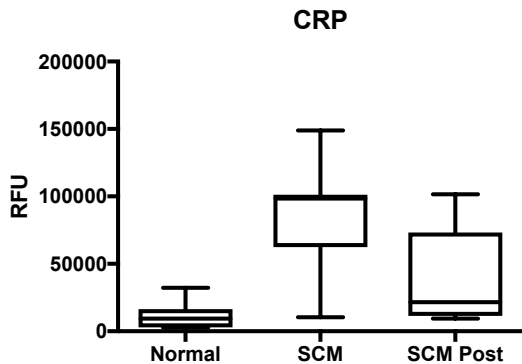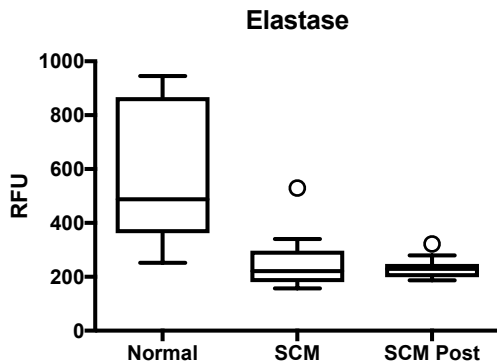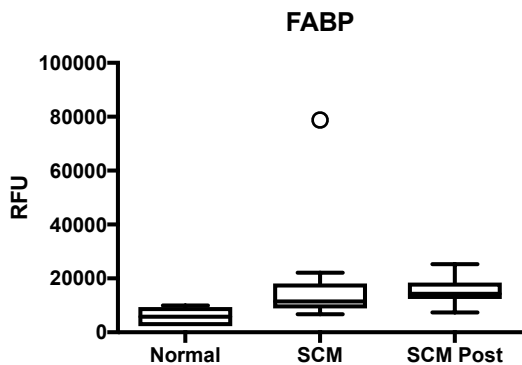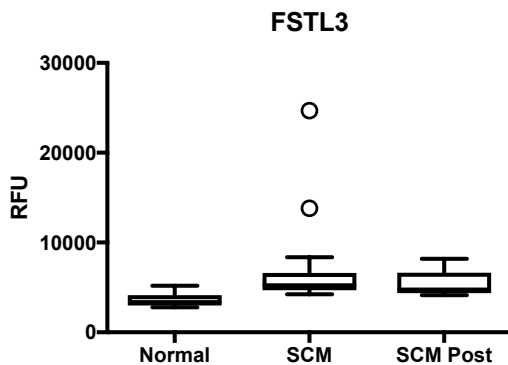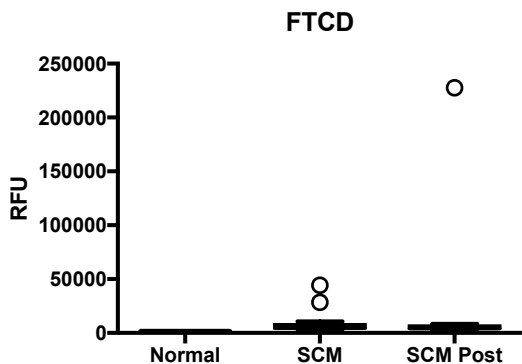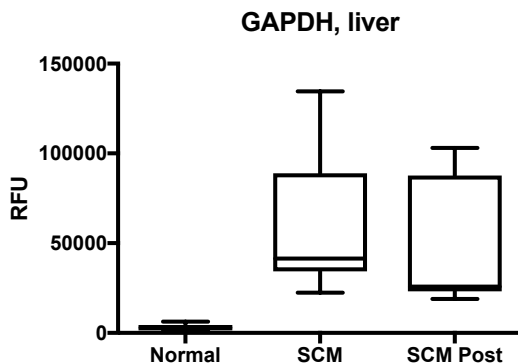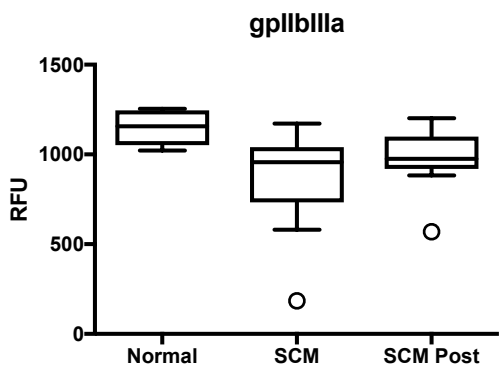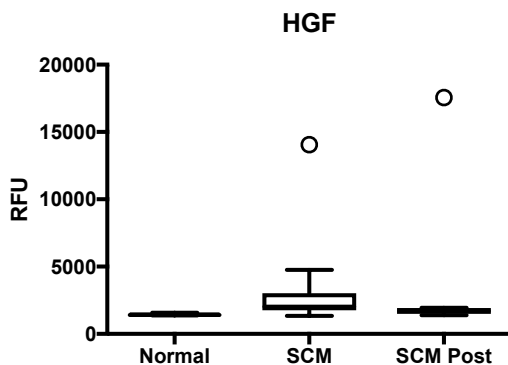

**hnRNP K**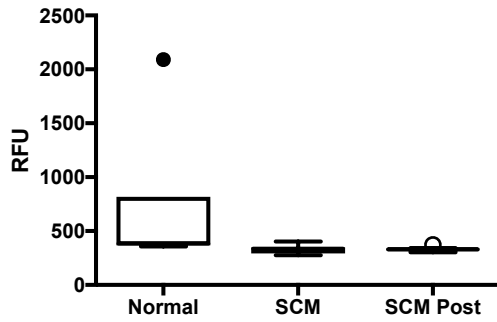**iC3b**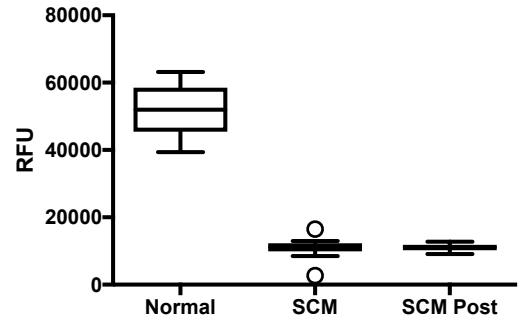**IL-1F6**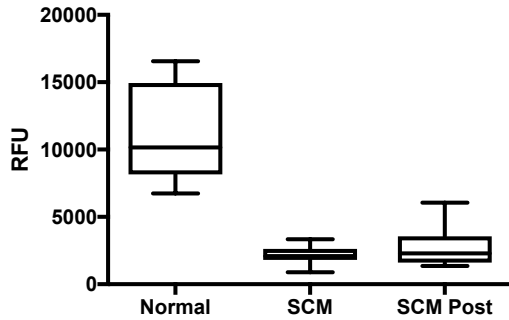**Integrin a1b1**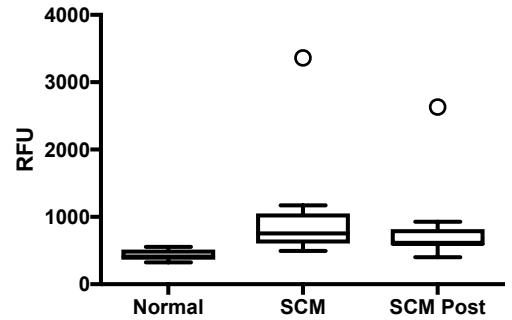**LKHA4**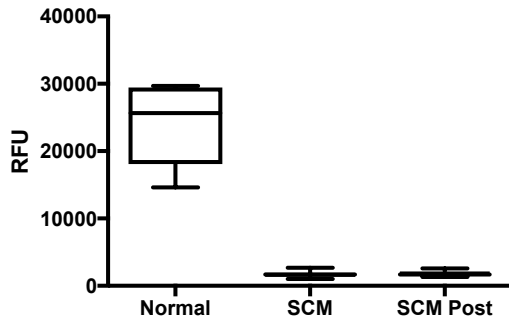**M2-PK**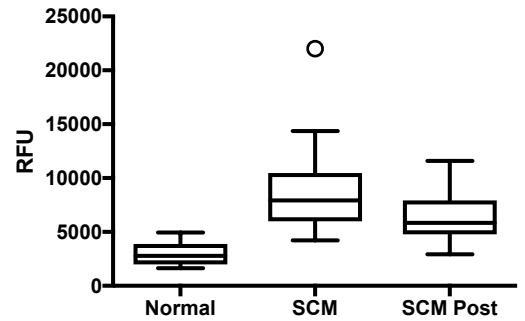**MBL**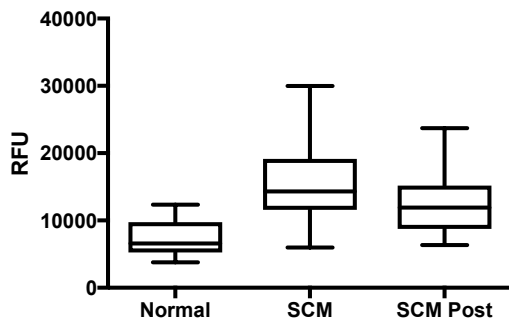**MFGM**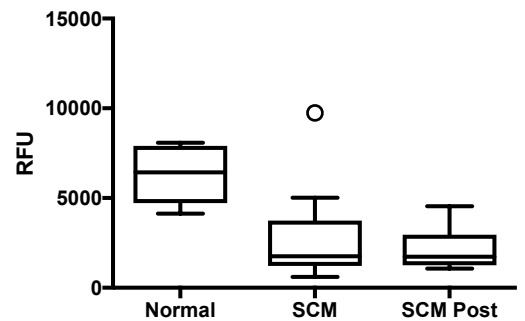

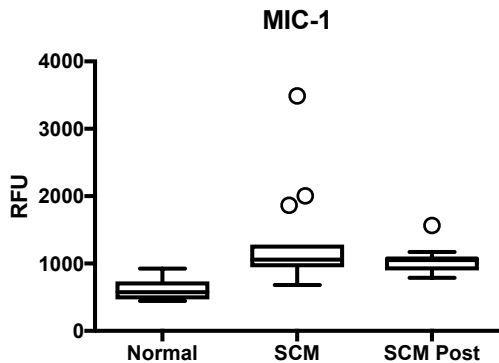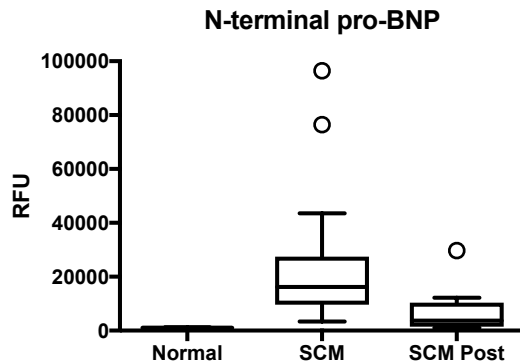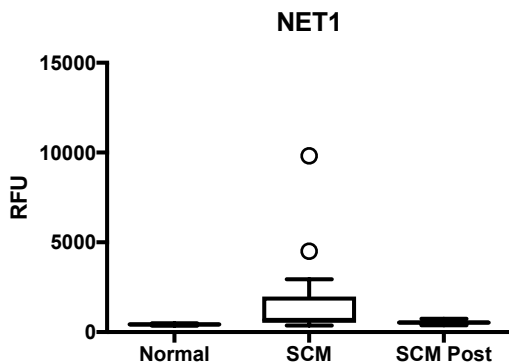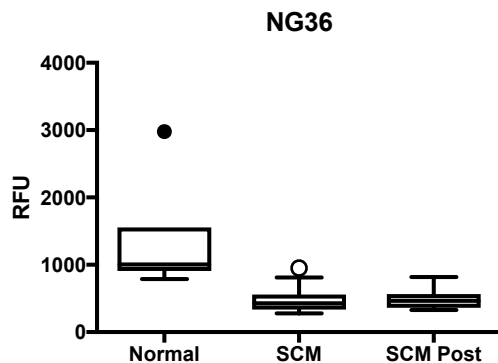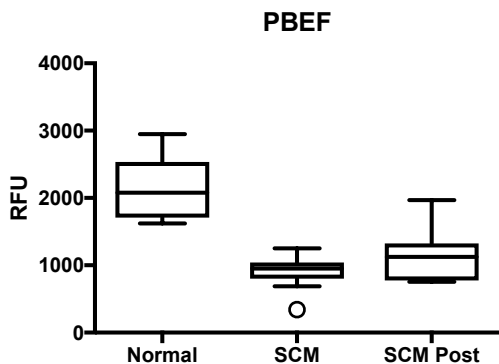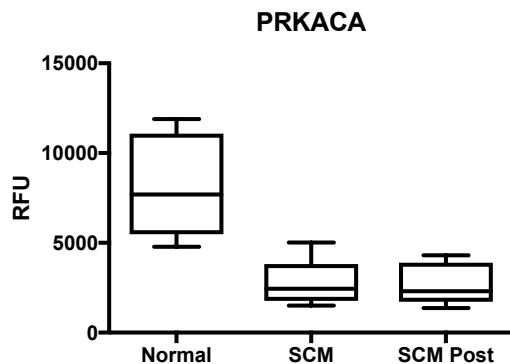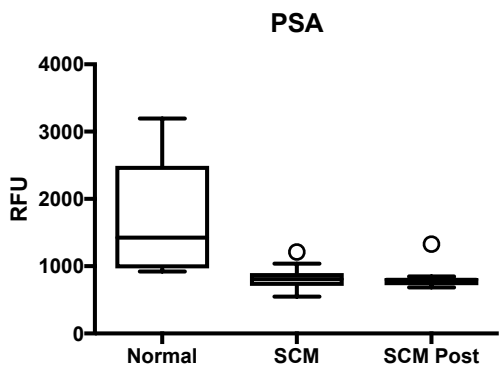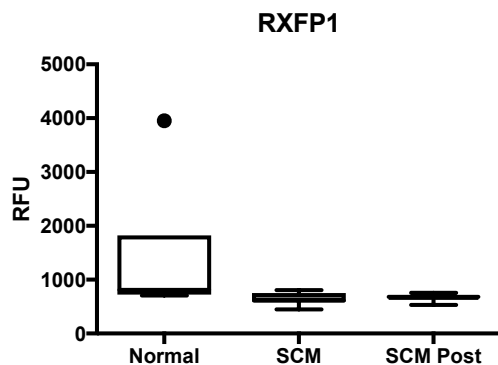

**SARP-2**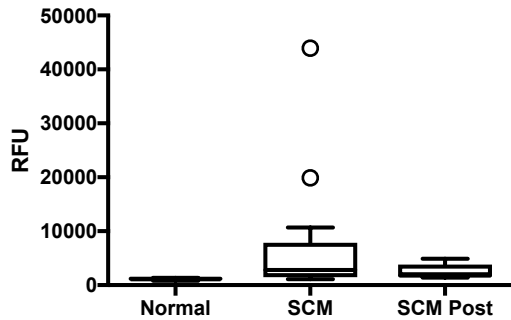**Thrombin**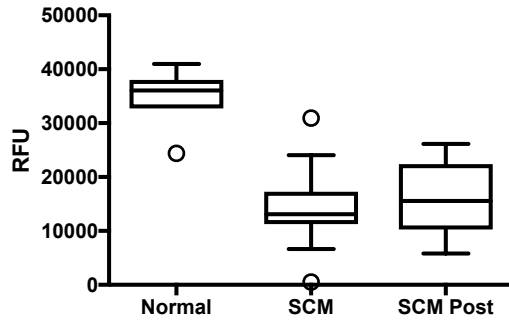**Troponin I**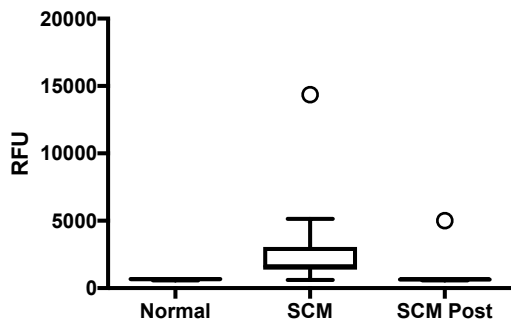**tPA**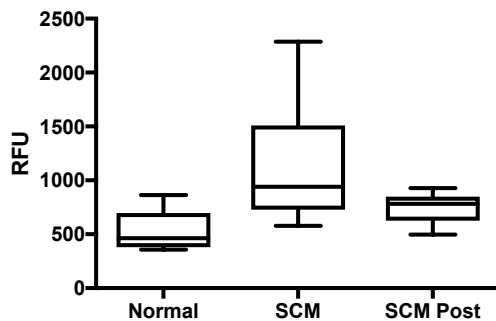**TSP2**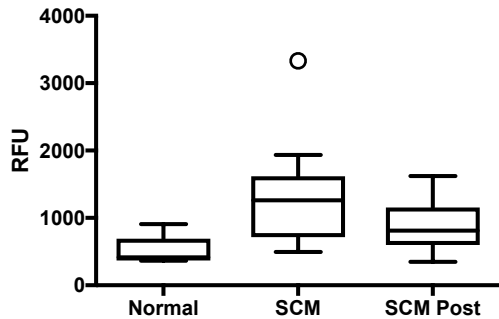

Supplement: data_sheet_1.pdf [file data_sheet_1.pdf]
