# Supplementary material for: Activation of Inflammatory and Pro-Thrombotic Pathways in Acute Stress Cardiomyopathy
Source: PubMed Central journal article supplement (PMC5541033; doi:10.3389/fcvm.2017.00049), 2017-08-03

Supplementary Figure 2. Barplots for the normal vs. AMI and AMI post comparison. The proteins shown in this figure are the 35 proteins that were significantly different ( $\log_2 FC > 1$ ;  $q < 0.05$ ) in the normal vs. AMI comparison. Normal (n=6), AMI (n=12), AMI post (n=4).

**a2-Macroglobulin**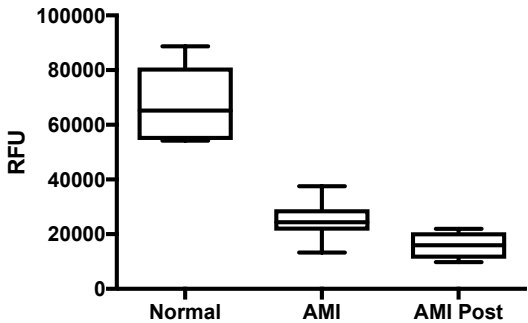**Albumin**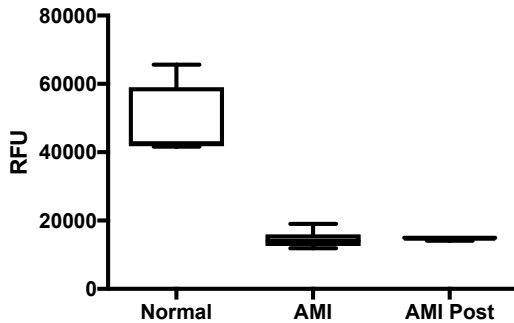**Apo B**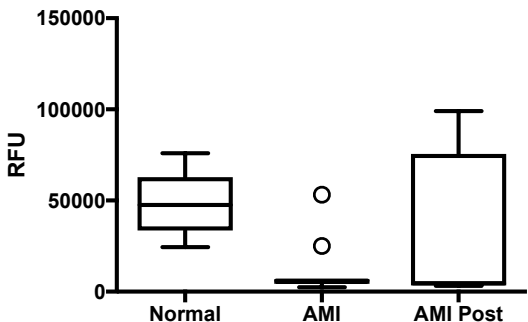**Apo E**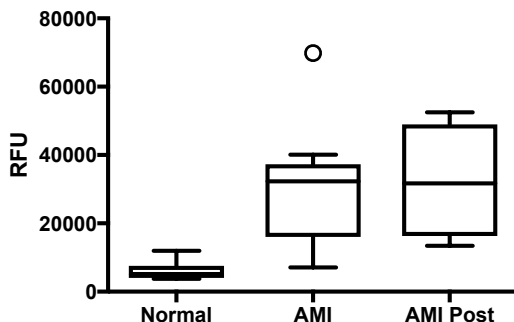**Apo E3**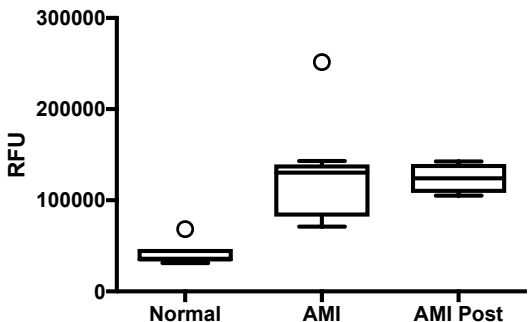**Apo E4**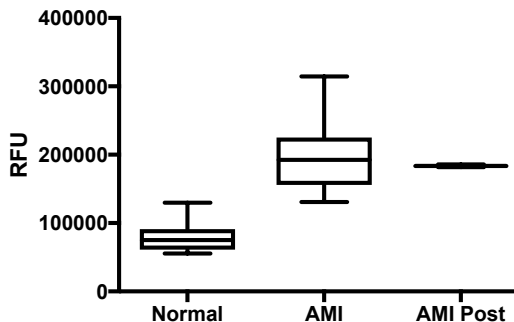**C3a**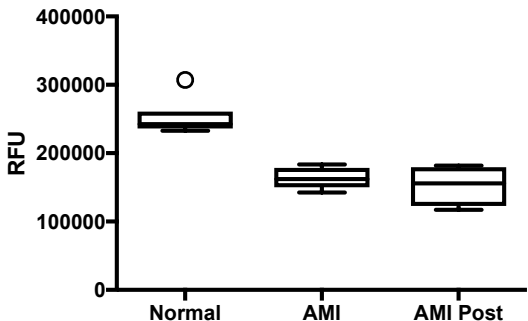**C3b**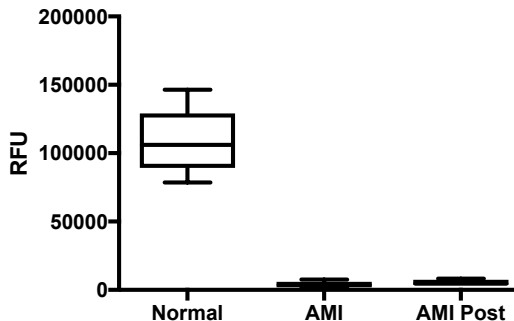

**C4b**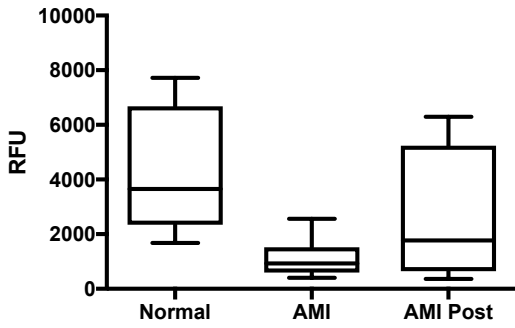**Coagulation Factor IX**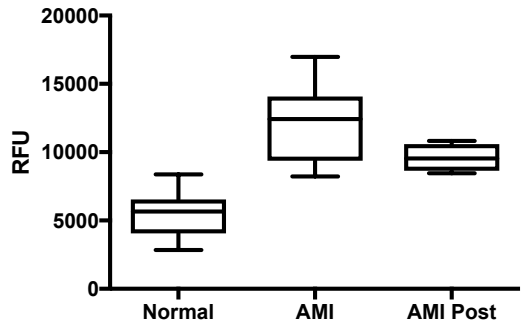**Coagulation Factor IXab**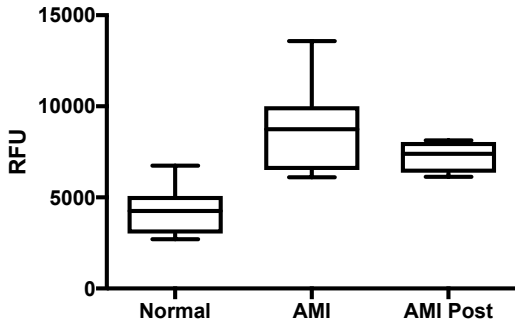**CRP**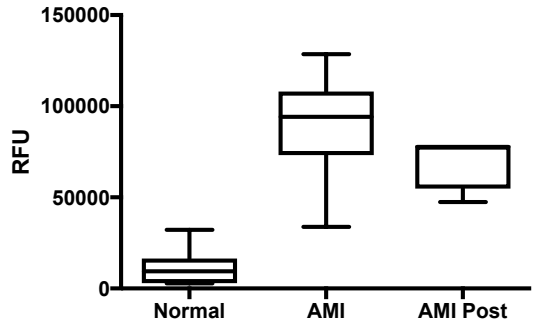**Fibrinogen g-chain dimer**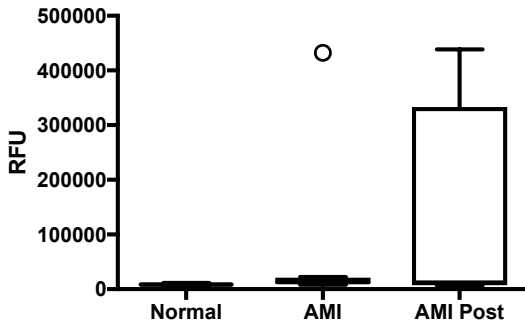**GAPDH, liver**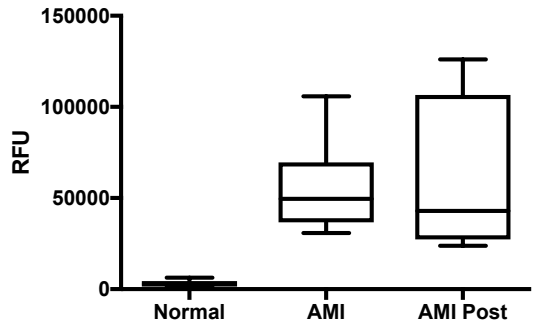**HGF**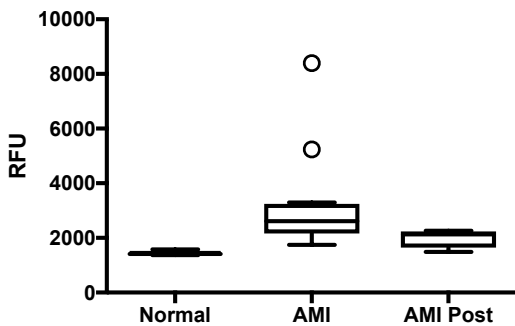**iC3b**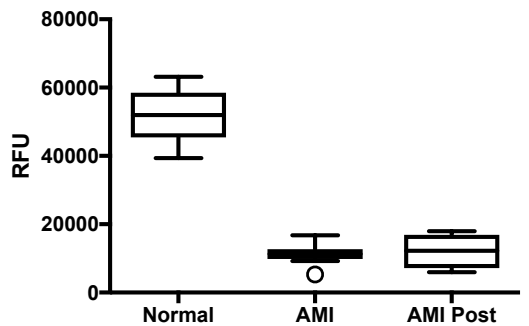

**IL-1F6**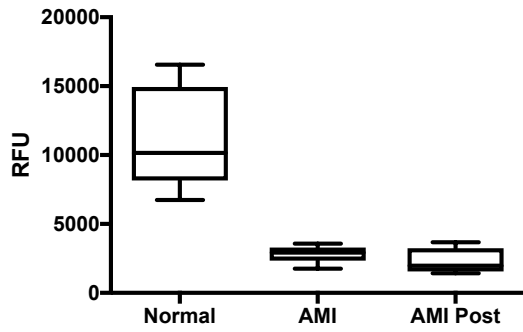**Integrin a1b1**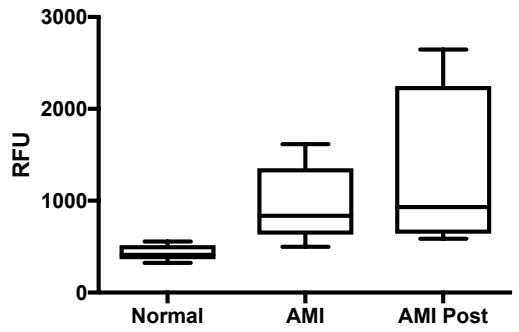**LEAP-1**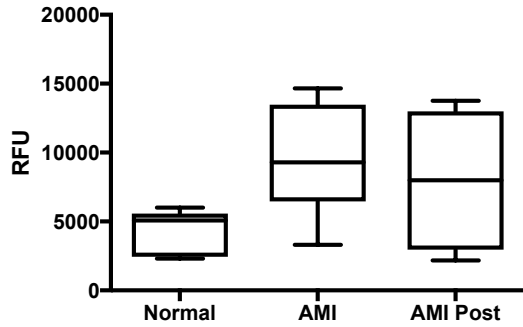**LKHA4**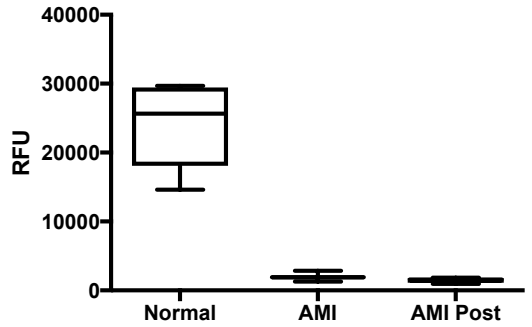**M2-PK**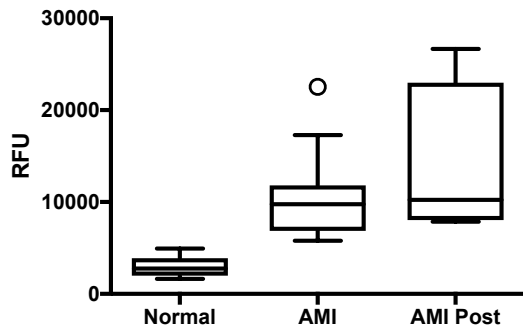**MBL**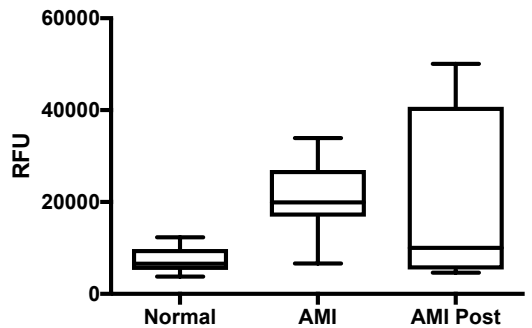**MFGM**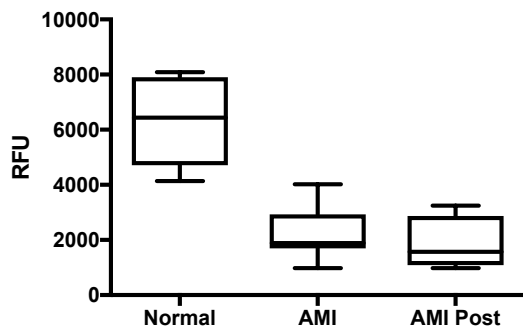**MIC-1**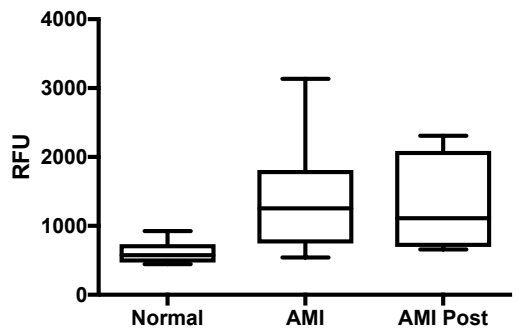

**N-terminal pro-BNP**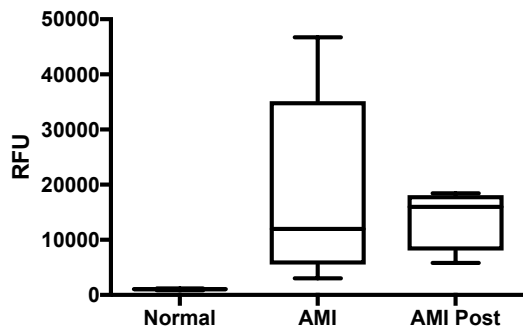**NG36**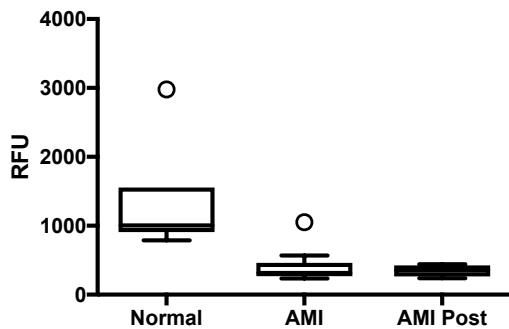**PBEF**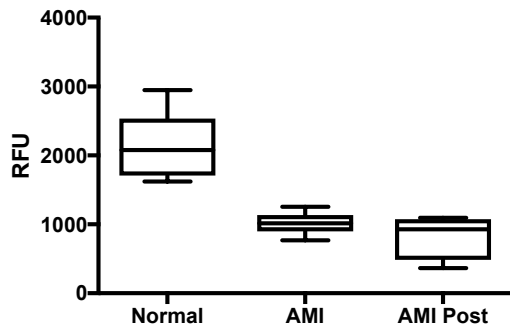**PRKACA**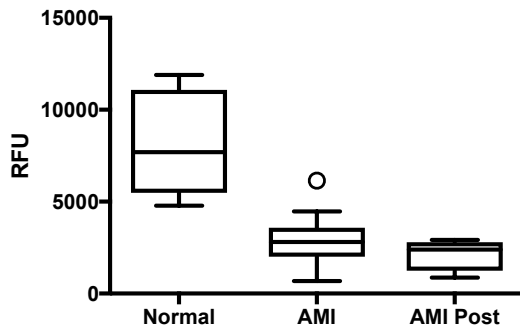**PSA**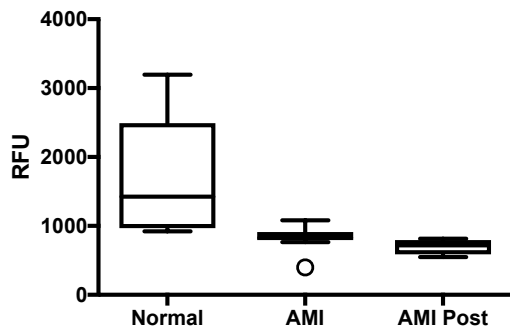**PTP-1C**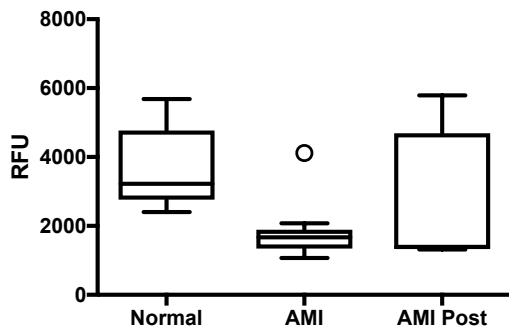**QORL1**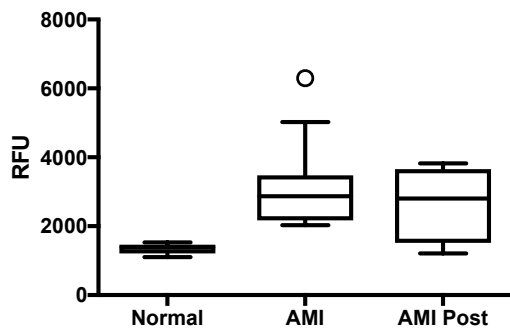**RXFP1**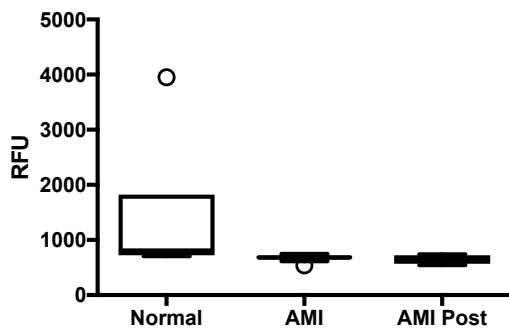

### Thrombin

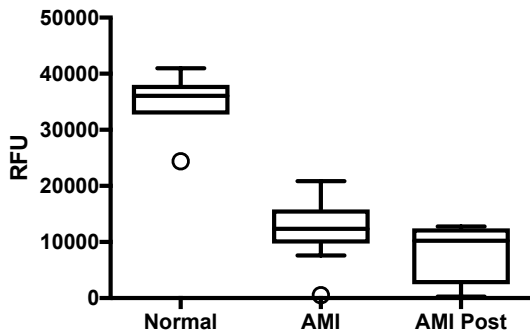

### Troponin I

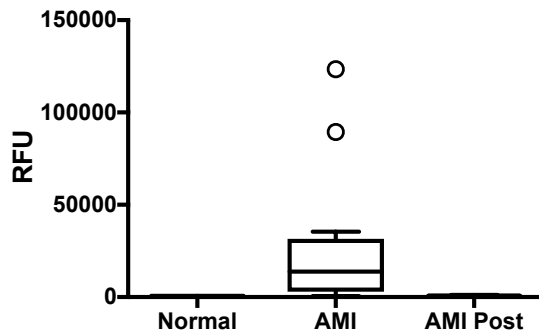

### XPNPEP1

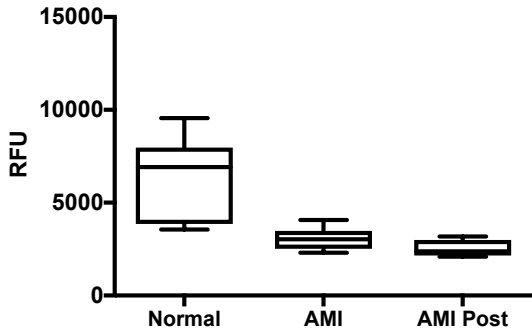

Supplement: data_sheet_2.pdf [file data_sheet_2.pdf]
